# Supplementary material for: Development of anex vivobreast cancer lung colonization model utilizing a decellularized lung matrix
Source: Royal Society of Chemistry journal article supplement (doi:10.1039/c5ib00157a), 2015-11-05
Supplement: c5ib00157a1.pdf [file c5ib00157a1.pdf]

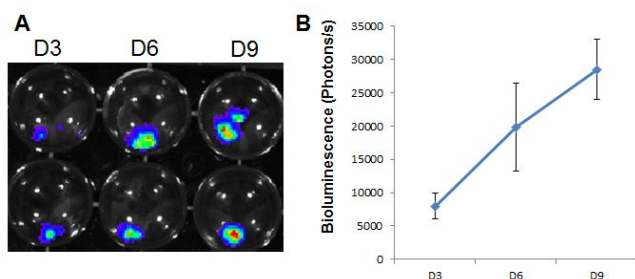

**Supplemental Figure 1. Metastatic 4T1 cells growth in decellularized lung tissue.** (A) IVIS Images showed the growth of 4T1-Luc cells in decellularized lung tissue on Day 3, Day 6, Day 9. (B) Quantification of the IVIS images showed the number of 4T1-Luc cells on Day 3, Day 6 and Day 9.
